# Supplementary material
Source: MDPI journal article supplement (https://www.mdpi.com/1999-4907/15/4/678)
Supplement: s1 [file s1]

Table S1 The proportion of non-susceptible landslide areas in different geological environment sub-regions

| Subarea<br>Code  | Subarea name                                       | QNL_CHN<br>model | QNL_ITA<br>model | Fuzzy logic<br>model |
|------------------|----------------------------------------------------|------------------|------------------|----------------------|
| I <sub>1</sub>   | Songliao Plain                                     | 0.86             | 0.99             | 0.99                 |
| I <sub>2</sub>   | Sanjiang Xingkai Lake Plain                        | 0.84             | 0.94             | 0.97                 |
| I <sub>3</sub>   | Hulunbuir Plateau                                  | 0.76             | 0.97             | 1.00                 |
| I <sub>4</sub>   | Da Hinggan-Lesser Khingan Mountains                | 0.25             | 0.62             | 0.73                 |
| I <sub>5</sub>   | Changbai Mountain Range                            | 0.22             | 0.56             | 0.54                 |
| I <sub>6</sub>   | Liaodong Low Mountains and Hills                   | 0.21             | 0.49             | 0.37                 |
| II <sub>1</sub>  | Huanghuaihai Plain                                 | 0.93             | 0.98             | 0.98                 |
| II <sub>2</sub>  | Yangtze River Delta                                | 0.83             | 0.91             | 0.85                 |
| II <sub>3</sub>  | Shandong Low Mountains and Hills                   | 0.56             | 0.82             | 0.75                 |
| III <sub>1</sub> | The Middle and Lower Yangtze Valley Plain          | 0.75             | 0.94             | 0.92                 |
| III <sub>2</sub> | Hunan Jiangxi Guangxi Low Mountain and Hilly Areas | 0.23             | 0.55             | 0.30                 |
| III <sub>3</sub> | Huaiyang Mountain Basin                            | 0.38             | 0.71             | 0.56                 |
| III <sub>4</sub> | Southeast hilly and mountainous areas              | 0.25             | 0.55             | 0.24                 |
| III <sub>5</sub> | Hainan Plain Mountains                             | 0.38             | 0.77             | 0.58                 |
| III <sub>6</sub> | Taiwan Plain Mountains                             | 0.61             | 0.81             | 0.26                 |
| IV <sub>1</sub>  | Fenwei Basin                                       | 0.58             | 0.78             | 0.66                 |
| IV <sub>2</sub>  | Yinchuan Hetao Plain                               | 0.75             | 0.89             | 0.83                 |
| IV <sub>3</sub>  | Ordos Plateau                                      | 0.64             | 0.93             | 0.97                 |
| IV <sub>4</sub>  | Longdong Shaanbei Loess Plateau                    | 0.08             | 0.26             | 0.10                 |
| IV <sub>5</sub>  | Shaanxi Loess Plateau                              | 0.15             | 0.42             | 0.22                 |
| IV <sub>6</sub>  | Yinshan Yanshan Mountain Range                     | 0.34             | 0.68             | 0.57                 |
| IV <sub>7</sub>  | Taihang Lvliang Mountains                          | 0.20             | 0.50             | 0.27                 |
| V <sub>1</sub>   | Sichuan Basin                                      | 0.24             | 0.58             | 0.56                 |

|                  |                                                          |      |      |      |
|------------------|----------------------------------------------------------|------|------|------|
| V <sub>2</sub>   | Qinling-Daba mountainous region                          | 0.24 | 0.51 | 0.07 |
| V <sub>3</sub>   | 长江三峡地质环境亚区                                               | 0.26 | 0.55 | 0.22 |
| V <sub>4</sub>   | Yunnan Central<br>Sichuan Southwest<br>Plateau Mountains | 0.33 | 0.61 | 0.07 |
| V <sub>5</sub>   | West Hubei Yunnan<br>Guizhou Zhongshan<br>Plateau        | 0.14 | 0.40 | 0.08 |
| V <sub>6</sub>   | Yunnan West Central<br>region                            | 0.26 | 0.58 | 0.03 |
| VI <sub>1</sub>  | Tarim Hexi Corridor<br>region                            | 0.71 | 0.93 | 0.93 |
| VI <sub>2</sub>  | Zhunge'er Basin                                          | 0.65 | 0.93 | 0.89 |
| VI <sub>3</sub>  | Tianshan Mountains                                       | 0.54 | 0.85 | 0.60 |
| VI <sub>4</sub>  | Altai Mountains                                          | 0.30 | 0.68 | 0.25 |
| VI <sub>5</sub>  | The Inner Mongolian<br>Plateau                           | 0.66 | 0.93 | 0.92 |
| VII <sub>1</sub> | Qaidam Basin                                             | 0.54 | 0.81 | 0.64 |
| VII <sub>2</sub> | Northern Tibetan<br>Plateau                              | 0.41 | 0.72 | 0.44 |
| VII <sub>3</sub> | Western Sichuan<br>Eastern Tibet Plateau                 | 0.45 | 0.67 | 0.08 |
| VII <sub>4</sub> | Qilian Mountain Range                                    | 0.31 | 0.70 | 0.33 |
| VII <sub>5</sub> | Kunlun Mountains                                         | 0.45 | 0.74 | 0.28 |
| VII <sub>6</sub> | Himalayan Mountains                                      | 0.41 | 0.70 | 0.15 |
